# Supplementary material for: 3D-printed nerve guidance conduits multi-functionalized with canine multipotent mesenchymal stromal cells promote neuroregeneration after sciatic nerve injury in rats
Source: PubMed Central journal article supplement (PMC8164252; doi:10.1186/s13287-021-02315-8), 2021-05-29

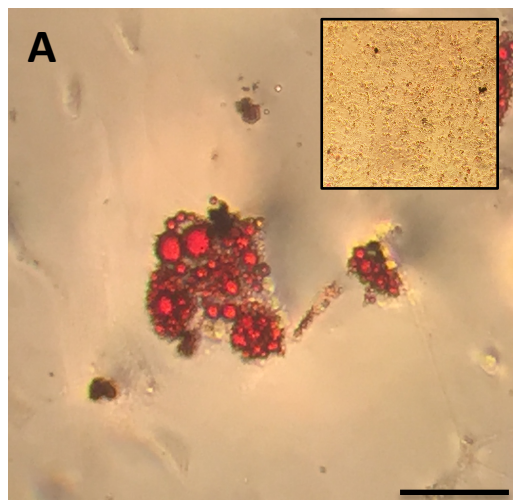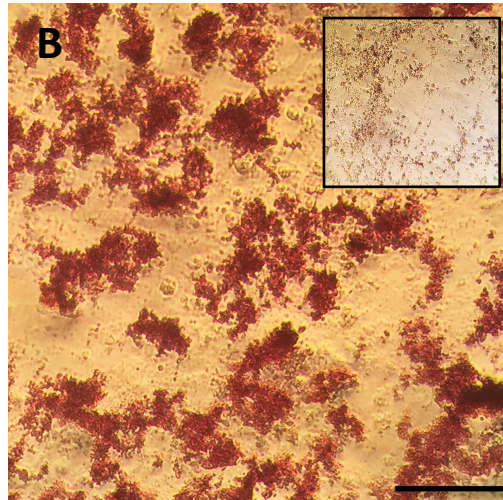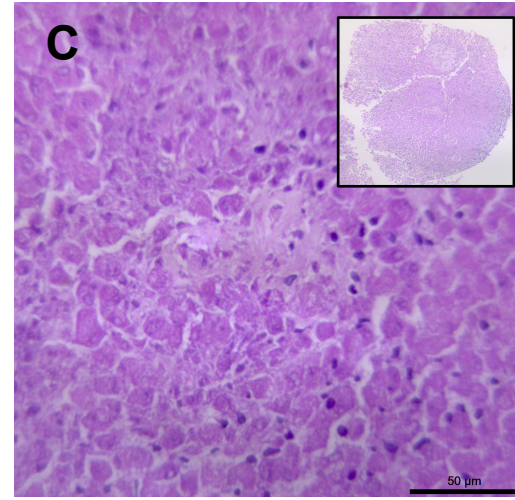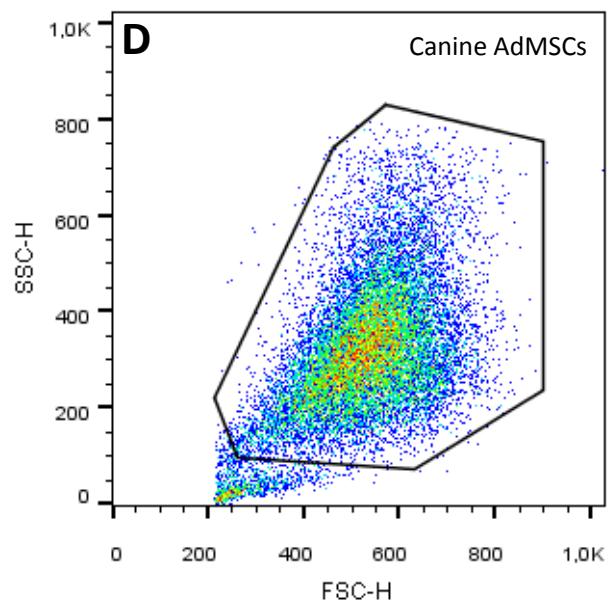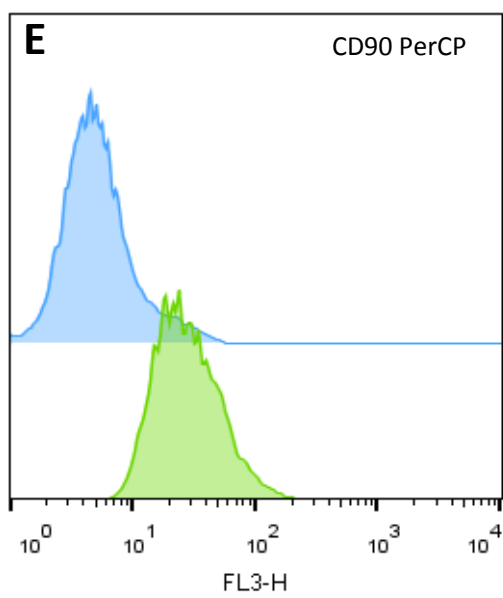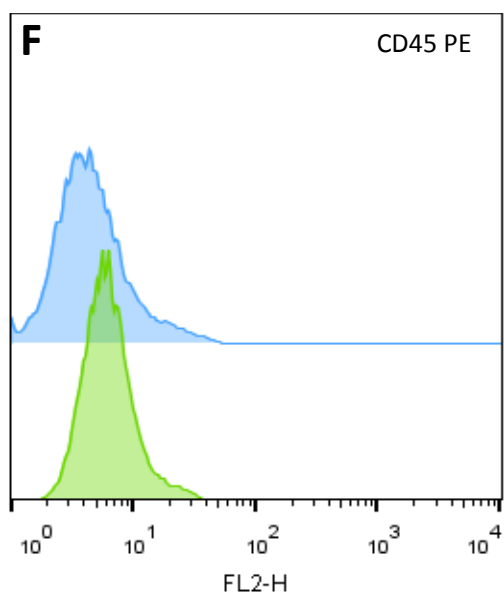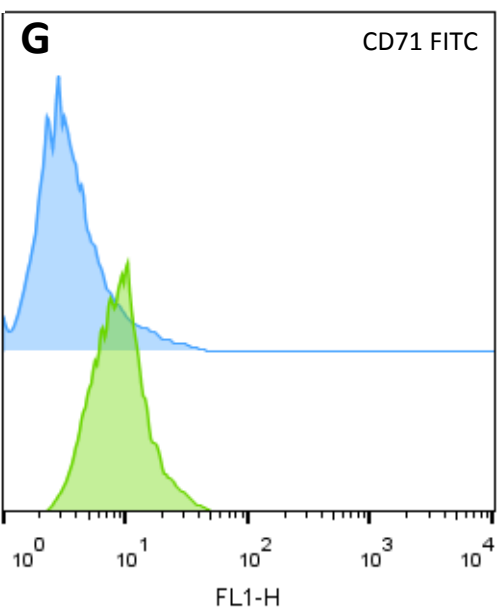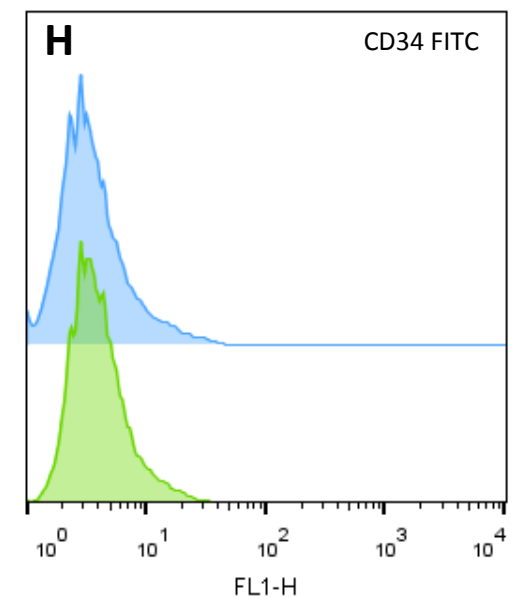

Supplement: 13287_2021_2315_MOESM4_ESM.pdf [file 13287_2021_2315_MOESM4_ESM.pdf]
